# Supplementary material for: Distinct patterns of progressive gray and white matter degeneration in amyotrophic lateral sclerosis
Source: PubMed Central journal article supplement (PMC8886653; doi:10.1002/hbm.25738), 2021-12-15
Supplement: HBM-43-1519-s002.pdf [file HBM-43-1519-s002.pdf]

**Supplementary Table 1:** Calculation of the upper motor neuron burden score. Muscle tone and limb reflexes were tested bilaterally in arms and legs. The score associated with the presence of the clinical sign is provided in brackets.

| Clinical exam          | Neurological sign and score   |
|------------------------|-------------------------------|
| Muscle tone (x4)       | Hypertonia (1)                |
| Reflexes               |                               |
| Jaw reflex             | Hyperreflexia (1), clonus (2) |
| Limb reflexes (x4)     | Hyperreflexia (1), clonus (2) |
| Babinski reflex (x2)   | Positive (1)                  |
| Total UMN burden score | /16                           |

UMN = upper motor neuron

**Supplementary Table 2:** MRI acquisition parameters for 3D T1-weighted scans (all 1 mm isotropic) at the six centres included in this study. Most centres implemented two different protocols as part of the Canadian ALS Neuroimaging Consortium.

| Centres                      | University of British Columbia | University of Calgary |                   | University of Alberta |                  |
|------------------------------|--------------------------------|-----------------------|-------------------|-----------------------|------------------|
|                              | Protocol 1                     | Protocol 1            | Protocol 2        | Protocol 1            | Protocol 2       |
| <i>n</i> (controls/patients) | 10/9                           | 9/9                   | 11/7              | 19/17                 | 26/21            |
| Scanner vendor               | Philips                        | General Electric      | General Electric  | Siemens               | Siemens          |
| Head coil channels           | 8                              | 12                    | 32                | 20                    | 64               |
| Acquisition matrix           | 240 x 240                      | 256 x 256             | 224 x 256         | 256 x 256             | 232 x 256        |
| Field of view ( $mm^2$ )     | 240 x 240                      | 256 x 256             | 256 x 256         | 256 x 256             | 232 x 256        |
| Slice thickness ( $mm$ )     | 1                              | 1                     | 1                 | 1                     | 1                |
| Orientation                  | Axial                          | Axial                 | Sagittal          | Axial                 | Sagittal         |
| Number of slices             | 150                            | 176                   | 176               | 176                   | 176              |
| Repetition time ( $ms$ )     | 7.9                            | 7.4                   | 8.1               | 2300                  | 1700             |
| Echo time ( $ms$ )           | 3.5                            | 3.1                   | 3.2               | 3.4                   | 2.2              |
| Inversion time ( $ms$ )      | 950                            | 400                   | 400               | 900                   | 880              |
| Flip angle ( $^\circ$ )      | 8                              | 11                    | 16                | 9                     | 10               |
| Centres                      | University of Toronto          |                       | McGill University |                       | Laval University |
|                              | Protocol 1                     | Protocol 2            | Protocol 1        | Protocol 2            | Protocol 1       |
| <i>n</i> (controls/patients) | 11/23                          | 8/20                  | 6/12              | 10/8                  | 9/11             |
| Scanner vendor               | General Electric               | Siemens               | Siemens           | Siemens               | Philips          |
| Head coil channels           | 8                              | 64                    | 32                | 64                    | 8                |
| Acquisition matrix           | 256 x 256                      | 232 x 256             | 256 x 256         | 232 x 256             | 256 x 256        |
| Field of view ( $mm^2$ )     | 256 x 256                      | 232 x 256             | 256 x 256         | 232 x 256             | 256 x 256        |
| Slice thickness ( $mm$ )     | 1                              | 1                     | 1                 | 1                     | 1                |
| Orientation                  | Axial                          | Sagittal              | Axial             | Sagittal              | Sagittal         |
| Number of slices             | 176                            | 176                   | 176               | 176                   | 176              |
| Repetition time ( $ms$ )     | 7.7                            | 1700                  | 2300              | 1700                  | 7.1              |
| Echo time ( $ms$ )           | 2.9                            | 2.2                   | 3.4               | 2.2                   | 3.4              |
| Inversion time ( $ms$ )      | 400                            | 880                   | 900               | 880                   | 950              |
| Flip angle ( $^\circ$ )      | 11                             | 10                    | 9                 | 10                    | 10               |

**Supplementary Table 3: Characteristics of slow and fast progressing ALS patients at baseline.** Data is represented as mean  $\pm$  standard deviation. Significant between-group differences ( $P < 0.05$ ) are highlighted in bold.

|                                       | Slow progressing ALS | Fast progressing ALS | <i>P</i> value                |
|---------------------------------------|----------------------|----------------------|-------------------------------|
| <i>n</i>                              | 67                   | 67                   |                               |
| Age (years)                           | 59.7 $\pm$ 11.1      | 58.2 $\pm$ 9.2       | 0.4 <sup>a</sup>              |
| Gender, male/female                   | 44/23                | 40/27                | 0.5 <sup>b</sup>              |
| Site of symptom onset,<br>limb/bulbar | 61/6                 | 47/19                | <b>0.004<sup>b</sup></b>      |
| ALSFRS-R                              | 40.0 $\pm$ 4.9       | 35.5 $\pm$ 5.7       | <b>&lt; 0.001<sup>a</sup></b> |
| Symptom duration (months)             | 45.2 $\pm$ 28.8      | 19.5 $\pm$ 11.2      | <b>&lt; 0.001<sup>a</sup></b> |
| Disease progression rate              | 0.2 $\pm$ 0.09       | 0.7 $\pm$ 0.4        | <b>&lt; 0.001<sup>a</sup></b> |
| UMN burden score                      | 4.6 $\pm$ 2.5        | 6.3 $\pm$ 3.0        | <b>0.002<sup>a</sup></b>      |
| Finger tapping score                  | 46.6 $\pm$ 12.2      | 40.6 $\pm$ 13.8      | <b>0.03<sup>a</sup></b>       |
| Foot tapping score                    | 31.2 $\pm$ 11.7      | 26.9 $\pm$ 12.6      | 0.1 <sup>a</sup>              |

UMN = upper motor neuron; LMN = lower motor neuron; ALSFRS-R = amyotrophic lateral sclerosis functional rating scale-revised; disease progression rate = (48 – ALSFRS-R)/symptom duration;  $\Delta T_{0-max}$  = time interval between baseline and last follow-up MRI; <sup>a</sup> = independent samples *t*-test; <sup>b</sup> = chi-squared test
